# Supplementary material for: Case of Sternoclavİcular Joİnt Arthrİtİs Confused Wİth Catheter-Related Tunnel İnfectİon
Source: Research Square preprint supplement (doi:10.21203/rs.3.rs-5569611/v1), 2025-04-28
Supplement: Supplementary file 1 [file 530173078cc01aa28f1fee12.docx]

Dear editör, there is no supportive material available for this case report.
